# Supplementary material for: Unveiling the biodiversity and conservation significance of Jianfengling： a camera-trapping survey of mammals in Hainan Tropical Rainforest National Park
Source: Research Square preprint supplement (doi:10.21203/rs.3.rs-6436787/v1), 2025-04-25
Supplement: Supplementary file 1 [file 9cd520ea666886183128c374.xlsx]

## Sheet: Sheet1
相机编号	海拔	植被类型	野猪照片数	海南麂	猕猴	豹猫	豪猪	帚尾豪猪	椰子猫	鼬獾	巨松鼠	红腿长吻松鼠	隐纹花松鼠	北树鼩	赤腹松鼠	穿山甲	黄腹鼬	Domestic dogs	Human	总数
215	326	E	2	0	1	2	0	0	0	0	0	5	0	0	1	0	0	0	0	11
220	380	E	9	0	3	0	0	3	4	6	0	0	0	0	1	0	0	0	0	26
225	390	E	0	0	0	0	0	0	0	0	0	0	0	0	0	0	0	0	0	0
316	475	E	13			1			2	1		2			1	0	0	0	0	20
321	400	V	1		2										20	0	0	0	1	24
525	640	E	5		1	2		53	1	17		38	1		6	0	0	0	1	125
610	896	M	3	8		1		82		18		1		1	1	0	0	2	0	117
615	887	M	3	6	3	1		35		6		14			32	0	0	1	0	101
618	1016	M		1	1											0	0	0	0	2
619	954	M	6	82	2			11	1	26		3		1		0	0	0	0	132
620	894	M														0	0	0	0	0
621	513	E														0	0	0	0	0
624	987	M	37	41	3	1		7	6						9	0	0	1	1	106
706	1077	M	2	7	4			2	1	5		10	2		5	0	0	1	0	39
711	862	M	1	40		1		47	6	13		1			10	0	0	3	0	122
712	889	M														0	0	0	0	0
722	676	M	5	1				2							1	1	0	0	0	10
723	672	E	58	13	1			54	5	14		17			14	1	0	2	0	179
724	532	E	9			4		78	5	56		5		3	47	0	0	3	0	210
725	464	E	6			1		111	5	9		53		5	34	0	1	1	0	226
801	512	E			1							7			48	0	0	0	0	56
813	756	M														0	0	0	0	0
818	620	E	2		1			33		4					9	0	0	0	0	49
821	411	E	20			1		105	1	47		2		2	6	0	0	3	2	189
822	448	E	104			1		31		1			1		9	0	0	2	6	155
823	503	E	1					1								0	0	0	1	3
825	728	M	11												3	0	0	0	0	14
921	678	M	3												4	0	0	0	0	7
1104	745	M	12		1	4		36	1	5		72			17	0	0	5	0	153
1105	724	M	45					1		5		2			4	0	0	0	0	57
1109	815	M	1			3		21	1	9		11		1	6	0	0	1	0	54
1110	777	M	20	11				6	2	23		11			3	0	0	3	0	79
1115	923	M	5	45								1				0	0	2	0	53
1119	1098	M						12				4				0	0	0	0	16
1123	974	M	2									8			2	0	0	0	0	12
1124	724	M	1	61				102		2		50			23	0	0	0	0	239
1201	859	M	5	3	3				3	13		10		7	37	0	0	2	0	83
1202	787	M	8	39		1			2	3		1			17	0	0	1	6	78
1203	1030	M	26	26	1	3		53	10	46		44			26	0	0	1	0	236
1204	940	M	1	8		2			2	22		16			3	0	0	0	0	54
1206	967	M	2	12				3								0	0	4	2	23
1210	963	M	3	10	2	1		12	4	10		3			5	0	0	0	0	50
1211	817	M	1	12		4		2		3						0	0	2	0	24
1212	908	M	3	8	2	3		5	7	5		26			26	0	0	2	0	87
1214	871	M														0	0	0	0	0
1217	921	M	53	45	1	4		44	5	20		17			2	0	0	0	0	191
1219	867	M		9	1			19	1	1		8				0	0	0	0	39
1220	961	M	11	2				4	3			1				1	0	0	0	22
1222	1012	M	59	16		5		5	7	21		31			38	0	0	0	0	182
1223	997	M	10	32	2	1		19	6	6		2			4	0	0	0	2	84
1224	883	M	8	28		1		30	2	5		7			15	0	0	0	0	96
1225	883	M	22	81	2	3		115	7	27	1	63			15	1	0	0	1	338
1302	692	M	2	21	1	1		4	4	6		7			8	0	0	1	0	55
1303	759	M	15	29	2			107	9	21		29			11	0	0	3	0	226
1307	771	M														0	0	0	0	0
1308	754	M	14	30				7	2	19		4				0	0	0	0	76
1311	808	M														0	0	0	0	0
1313	710	M														0	0	0	0	0
1314	663	E	69	21	1	1	1	44	11	26		7		1		0	0	11	0	193
1319	728	M	2	16				4	1	2						0	0	0	0	25
1320	683	M	9	4			1	26		1						0	0	3	6	50
1321	956	M		1	2	4		11	19	19		61	2	1	92	0	0	0	3	215
1402	356	E	13					41	1	11					3	0	0	2	0	71
1403	425	E	16		1			2							5	0	0	1	0	25
1404	513	E	11							1						0	0	0	1	13
1405	648	M												3	9	0	0	0	0	12
1407	284	S	21					7		1					2	0	0	0	1	32
1408	328	E	4										5		16	0	0	0	0	25
1414	269	S	15					6	2	4		2		1	23	0	0	0	2	55
1415	270	S	1		1					1					2	0	0	0	0	5
1416	605	E														0	0	0	0	0
1417	508	E	5	5				1		1						0	0	5	0	17
1420	254	S	2													0	0	3	0	5
1423	310	S	22	2	2			12	1	2		2	1		29	0	0	0	0	73
1424	477	E			2								1		9	0	0	0	0	12
1501	707	M													4	0	0	0	0	4
1603	659	M	6							1		1				0	0	0	0	8
1613	237	S	5			1		43	2			5			5	0	0	0	0	61
1614	423	E	8							1				1	1	0	0	0	1	12
1708	942	M	1	6	4										4	0	0	0	2	17
1709	965	M	10	30		1				6					4	0	0	2	0	53
1712	758	M	19	29		2		6	1	4		28			13	0	0	0	3	105
1713	936	M		4												0	0	0	4	8
1715	793	M	6	10												0	0	0	0	16
1717	741	M		3						1		1			2	0	0	0	0	7
1722	734	M	5	16	1	1		14	3	12		73	1	1	59	0	0	0	6	192
1723	655	E	4					6							3	0	0	0	19	32
1724	758	M													1	0	0	0	0	1
1725	802	M	20	31				9	1	1		34			5	0	0	2	0	103
1809	501	E	8	5		4		4	6			1			5	1	0	0	0	34
1810	454	E	18	16	5		2	33	2			11		4	51	2	0	0	1	145
1811	788	M	6	22	2										5	0	0	0	0	35
1815	560	E						1							14	0	0	2	0	17
1817	642	M														0	0	0	0	0
1818	600	E	15	25	4		5	22	2	3		12		1	6	0	0	0	0	95
1819	523	E	18	8	7			26		4		4		1	6	2	0	0	1	77
1821	678	M	20	15				9				1			1	0	0	0	0	46
1822	585	E	19	13	2			5				1			3	0	0	0	0	43
1823	586	E	4	1								1			1	1	0	1	2	11
1824	604	E	8													0	0	0	1	9
1825	542	E	25	2	1			44	2			21		1	13	2	0	0	1	112
1901	371	E	6	8											4	0	0	0	0	18
1902	479	E	31	2	4			146	1	1		8			11	0	0	0	0	204
1903	471	E	3													0	0	0	0	3
1904	560	E													1	0	0	0	0	1
1905	655	M			2							2			21	0	0	2	2	29
1906	441	E	7				2	12								0	0	0	0	21
1909	753	M	18					2	1						49	0	0	0	0	70
1910	668	M													1	0	0	0	0	1
1911	564	E	7	1	1	1		35	5	1	1	87		14	24	0	0	23	0	200
1921	578	E	12						1			3			4	0	0	0	0	20
1922	504	E	5													0	0	0	0	5
2102	677	E	5	4								7		1	1	0	0	0	0	18
2103	616	E	1													0	0	0	0	1
2104	660	M	1													0	0	0	0	1
2107	575	E			1										2	0	0	0	0	3
2112	492	E														0	0	0	0	0
2113	457	E						2				2			31	0	0	0	1	36
2119	471	E	1									1	14	2	4	0	0	0	0	22
2216	380	E	1													0	0	0	1	2
2221	367	E	1									12			3	0	0	2	1	19
1604A	762	M						3		1		13			1	0	0	0	0	18
1604B	550	E	4			2				4		1			1	0	0	0	0	12
			1148	1027	84	69	11	1838	177	604	2	988	28	52	1077	12	1	105	82

## Sheet: Sheet2
Camera number	Camera-days	Elevation (m)	Vegetation types	Rhesus monkey Macaca mulatta	Chinese pangolin Manis pentadactyla	Common palm civet Paradoxurus hermaphroditus	Mainland leopard cat Prionailurus bengalensis	Yellow-bellied weasel Mustela kathiah	Small-toothed ferret badger Melogale moschata	Hainan muntjac Muntiacus nigripes	Wild boar Sus scrofa	Northern treeshrew Tupaia belangeri	Malayan porcupine Hystrix brachyura	Asiatic brush-tailed porcupine Atherurus macrourus	Black giant squirrel Ratufa bicolor	Red-hipped squirrel Dremomys pyrrhomerus	Maritime striped squirrel Tamiops maritimus	Pallas's squirrel Callosciurus erythraeus	Domestic dogs	Human
001	376	326	tropical evergreen monsoon forest (E)	1	0	0	2	0	0	0	2	0	0	0	0	5	0	1	0	0
002	376	380	tropical evergreen monsoon forest (E)	3	0	4	0	0	6	0	9	0	0	3	0	0	0	1	0	0
003	376	390	tropical evergreen monsoon forest (E)	0	0	0	0	0	0	0	0	0	0	0	0	0	0	0	0	0
004	376	475	tropical evergreen monsoon forest (E)	0	0	2	1	0	1	0	13	0	0	0	0	2	0	1	0	0
005	376	400	tropical valley rainforest (V)	2	0	0	0	0	0	0	1	0	0	0	0	0	0	20	0	1
006	385	640	tropical evergreen monsoon forest (E)	1	0	1	2	0	17	0	5	0	0	53	0	38	1	6	0	1
007	384	896	tropical montane rainforest (M)	0	0	0	1	0	18	8	3	1	0	82	0	1	0	1	2	0
008	384	887	tropical montane rainforest (M)	3	0	0	1	0	6	6	3	0	0	35	0	14	0	32	1	0
009	186	1016	tropical montane rainforest (M)	1	0	0	0	0	0	1	0	0	0	0	0	0	0	0	0	0
010	384	954	tropical montane rainforest (M)	2	0	1	0	0	26	82	6	1	0	11	0	3	0	0	0	0
011	0	894	tropical montane rainforest (M)	0	0	0	0	0	0	0	0	0	0	0	0	0	0	0	0	0
012	0	513	tropical evergreen monsoon forest (E)	0	0	0	0	0	0	0	0	0	0	0	0	0	0	0	0	0
013	384	987	tropical montane rainforest (M)	3	0	6	1	0	0	41	37	0	0	7	0	0	0	9	1	1
014	384	1077	tropical montane rainforest (M)	4	0	1	0	0	5	7	2	0	0	2	0	10	2	5	1	0
015	384	862	tropical montane rainforest (M)	0	0	6	1	0	13	40	1	0	0	47	0	1	0	10	3	0
016	0	889	tropical montane rainforest (M)	0	0	0	0	0	0	0	0	0	0	0	0	0	0	0	0	0
017	379	676	tropical montane rainforest (M)	0	1	0	0	0	0	1	5	0	0	2	0	0	0	1	0	0
018	379	672	tropical evergreen monsoon forest (E)	1	1	5	0	0	14	13	58	0	0	54	0	17	0	14	2	0
019	376	532	tropical evergreen monsoon forest (E)	0	0	5	4	0	56	0	9	3	0	78	0	5	0	47	3	0
020	376	464	tropical evergreen monsoon forest (E)	0	0	5	1	1	9	0	6	5	0	111	0	53	0	34	1	0
021	376	512	tropical evergreen monsoon forest (E)	1	0	0	0	0	0	0	0	0	0	0	0	7	0	48	0	0
022	0	756	tropical montane rainforest (M)	0	0	0	0	0	0	0	0	0	0	0	0	0	0	0	0	0
023	376	620	tropical evergreen monsoon forest (E)	1	0	0	0	0	4	0	2	0	0	33	0	0	0	9	0	0
024	376	411	tropical evergreen monsoon forest (E)	0	0	1	1	0	47	0	20	2	0	105	0	2	0	6	3	2
025	376	448	tropical evergreen monsoon forest (E)	0	0	0	1	0	1	0	104	0	0	31	0	0	1	9	2	6
026	376	503	tropical evergreen monsoon forest (E)	0	0	0	0	0	0	0	1	0	0	1	0	0	0	0	0	1
027	379	728	tropical montane rainforest (M)	0	0	0	0	0	0	0	11	0	0	0	0	0	0	3	0	0
028	377	678	tropical montane rainforest (M)	0	0	0	0	0	0	0	3	0	0	0	0	0	0	4	0	0
029	385	745	tropical montane rainforest (M)	1	0	1	4	0	5	0	12	0	0	36	0	72	0	17	5	0
030	385	724	tropical montane rainforest (M)	0	0	0	0	0	5	0	45	0	0	1	0	2	0	4	0	0
031	385	815	tropical montane rainforest (M)	0	0	1	3	0	9	0	1	1	0	21	0	11	0	6	1	0
032	385	777	tropical montane rainforest (M)	0	0	2	0	0	23	11	20	0	0	6	0	11	0	3	3	0
033	385	923	tropical montane rainforest (M)	0	0	0	0	0	0	45	5	0	0	0	0	1	0	0	2	0
034	182	1098	tropical montane rainforest (M)	0	0	0	0	0	0	0	0	0	0	12	0	4	0	0	0	0
035	391	974	tropical montane rainforest (M)	0	0	0	0	0	0	0	2	0	0	0	0	8	0	2	0	0
036	391	724	tropical montane rainforest (M)	0	0	0	0	0	2	61	1	0	0	102	0	50	0	23	0	0
037	385	859	tropical montane rainforest (M)	3	0	3	0	0	13	3	5	7	0	0	0	10	0	37	2	0
038	385	787	tropical montane rainforest (M)	0	0	2	1	0	3	39	8	0	0	0	0	1	0	17	1	6
039	384	1030	tropical montane rainforest (M)	1	0	10	3	0	46	26	26	0	0	53	0	44	0	26	1	0
040	384	940	tropical montane rainforest (M)	0	0	2	2	0	22	8	1	0	0	0	0	16	0	3	0	0
041	385	967	tropical montane rainforest (M)	0	0	0	0	0	0	12	2	0	0	3	0	0	0	0	4	2
042	185	963	tropical montane rainforest (M)	2	0	4	1	0	10	10	3	0	0	12	0	3	0	5	0	0
043	385	817	tropical montane rainforest (M)	0	0	0	4	0	3	12	1	0	0	2	0	0	0	0	2	0
044	385	908	tropical montane rainforest (M)	2	0	7	3	0	5	8	3	0	0	5	0	26	0	26	2	0
045	0	871	tropical montane rainforest (M)	0	0	0	0	0	0	0	0	0	0	0	0	0	0	0	0	0
046	385	921	tropical montane rainforest (M)	1	0	5	4	0	20	45	53	0	0	44	0	17	0	2	0	0
047	384	867	tropical montane rainforest (M)	1	0	1	0	0	1	9	0	0	0	19	0	8	0	0	0	0
048	385	961	tropical montane rainforest (M)	0	1	3	0	0	0	2	11	0	0	4	0	1	0	0	0	0
049	384	1012	tropical montane rainforest (M)	0	0	7	5	0	21	16	59	0	0	5	0	31	0	38	0	0
050	384	997	tropical montane rainforest (M)	2	0	6	1	0	6	32	10	0	0	19	0	2	0	4	0	2
051	384	883	tropical montane rainforest (M)	0	0	2	1	0	5	28	8	0	0	30	0	7	0	15	0	0
052	384	883	tropical montane rainforest (M)	2	1	7	3	0	27	81	22	0	0	115	1	63	0	15	0	1
053	385	692	tropical montane rainforest (M)	1	0	4	1	0	6	21	2	0	0	4	0	7	0	8	1	0
054	385	759	tropical montane rainforest (M)	2	0	9	0	0	21	29	15	0	0	107	0	29	0	11	3	0
055	0	771	tropical montane rainforest (M)	0	0	0	0	0	0	0	0	0	0	0	0	0	0	0	0	0
056	189	754	tropical montane rainforest (M)	0	0	2	0	0	19	30	14	0	0	7	0	4	0	0	0	0
057	0	808	tropical montane rainforest (M)	0	0	0	0	0	0	0	0	0	0	0	0	0	0	0	0	0
058	0	710	tropical montane rainforest (M)	0	0	0	0	0	0	0	0	0	0	0	0	0	0	0	0	0
059	386	663	tropical evergreen monsoon forest (E)	1	0	11	1	0	26	21	69	1	1	44	0	7	0	0	11	0
060	386	728	tropical montane rainforest (M)	0	0	1	0	0	2	16	2	0	0	4	0	0	0	0	0	0
061	386	683	tropical montane rainforest (M)	0	0	0	0	0	1	4	9	0	1	26	0	0	0	0	3	6
062	384	956	tropical montane rainforest (M)	2	0	19	4	0	19	1	0	1	0	11	0	61	2	92	0	3
063	377	356	tropical evergreen monsoon forest (E)	0	0	1	0	0	11	0	13	0	0	41	0	0	0	3	2	0
064	377	425	tropical evergreen monsoon forest (E)	1	0	0	0	0	0	0	16	0	0	2	0	0	0	5	1	0
065	379	513	tropical evergreen monsoon forest (E)	0	0	0	0	0	1	0	11	0	0	0	0	0	0	0	0	1
066	379	648	tropical montane rainforest (M)	0	0	0	0	0	0	0	0	3	0	0	0	0	0	9	0	0
067	391	284	tropical semi-deciduous monsoon forest (S)	0	0	0	0	0	1	0	21	0	0	7	0	0	0	2	0	1
068	314	328	tropical evergreen monsoon forest (E)	0	0	0	0	0	0	0	4	0	0	0	0	0	5	16	0	0
069	314	269	tropical semi-deciduous monsoon forest (S)	0	0	2	0	0	4	0	15	1	0	6	0	2	0	23	0	2
070	391	270	tropical semi-deciduous monsoon forest (S)	1	0	0	0	0	1	0	1	0	0	0	0	0	0	2	0	0
071	0	605	tropical evergreen monsoon forest (E)	0	0	0	0	0	0	0	0	0	0	0	0	0	0	0	0	0
072	391	508	tropical evergreen monsoon forest (E)	0	0	0	0	0	1	5	5	0	0	1	0	0	0	0	5	0
073	391	254	tropical semi-deciduous monsoon forest (S)	0	0	0	0	0	0	0	2	0	0	0	0	0	0	0	3	0
074	391	310	tropical semi-deciduous monsoon forest (S)	2	0	1	0	0	2	2	22	0	0	12	0	2	1	29	0	0
075	390	477	tropical evergreen monsoon forest (E)	2	0	0	0	0	0	0	0	0	0	0	0	0	1	9	0	0
076	377	707	tropical montane rainforest (M)	0	0	0	0	0	0	0	0	0	0	0	0	0	0	4	0	0
077	391	659	tropical montane rainforest (M)	0	0	0	0	0	1	0	6	0	0	0	0	1	0	0	0	0
078	391	237	tropical semi-deciduous monsoon forest (S)	0	0	2	1	0	0	0	5	0	0	43	0	5	0	5	0	0
079	391	423	tropical evergreen monsoon forest (E)	0	0	0	0	0	1	0	8	1	0	0	0	0	0	1	0	1
080	389	942	tropical montane rainforest (M)	4	0	0	0	0	0	6	1	0	0	0	0	0	0	4	0	2
081	198	965	tropical montane rainforest (M)	0	0	0	1	0	6	30	10	0	0	0	0	0	0	4	2	0
082	389	758	tropical montane rainforest (M)	0	0	1	2	0	4	29	19	0	0	6	0	28	0	13	0	3
083	389	936	tropical montane rainforest (M)	0	0	0	0	0	0	4	0	0	0	0	0	0	0	0	0	4
084	389	793	tropical montane rainforest (M)	0	0	0	0	0	0	10	6	0	0	0	0	0	0	0	0	0
085	389	741	tropical montane rainforest (M)	0	0	0	0	0	1	3	0	0	0	0	0	1	0	2	0	0
086	389	734	tropical montane rainforest (M)	1	0	3	1	0	12	16	5	1	0	14	0	73	1	59	0	6
087	389	655	tropical evergreen monsoon forest (E)	0	0	0	0	0	0	0	4	0	0	6	0	0	0	3	0	19
088	389	758	tropical montane rainforest (M)	0	0	0	0	0	0	0	0	0	0	0	0	0	0	1	0	0
089	390	802	tropical montane rainforest (M)	0	0	1	0	0	1	31	20	0	0	9	0	34	0	5	2	0
090	388	501	tropical evergreen monsoon forest (E)	0	1	6	4	0	0	5	8	0	0	4	0	1	0	5	0	0
091	388	454	tropical evergreen monsoon forest (E)	5	2	2	0	0	0	16	18	4	2	33	0	11	0	51	0	1
092	389	788	tropical montane rainforest (M)	2	0	0	0	0	0	22	6	0	0	0	0	0	0	5	0	0
093	192	560	tropical evergreen monsoon forest (E)	0	0	0	0	0	0	0	0	0	0	1	0	0	0	14	2	0
094	180	642	tropical montane rainforest (M)	0	0	0	0	0	0	0	0	0	0	0	0	0	0	0	0	0
095	312	600	tropical evergreen monsoon forest (E)	4	0	2	0	0	3	25	15	1	5	22	0	12	0	6	0	0
096	388	523	tropical evergreen monsoon forest (E)	7	2	0	0	0	4	8	18	1	0	26	0	4	0	6	0	1
097	390	678	tropical montane rainforest (M)	0	0	0	0	0	0	15	20	0	0	9	0	1	0	1	0	0
098	390	585	tropical evergreen monsoon forest (E)	2	0	0	0	0	0	13	19	0	0	5	0	1	0	3	0	0
099	388	586	tropical evergreen monsoon forest (E)	0	1	0	0	0	0	1	4	0	0	0	0	1	0	1	1	2
100	387	604	tropical evergreen monsoon forest (E)	0	0	0	0	0	0	0	8	0	0	0	0	0	0	0	0	1
101	387	542	tropical evergreen monsoon forest (E)	1	2	2	0	0	0	2	25	1	0	44	0	21	0	13	0	1
102	390	371	tropical evergreen monsoon forest (E)	0	0	0	0	0	0	8	6	0	0	0	0	0	0	4	0	0
103	390	479	tropical evergreen monsoon forest (E)	4	0	1	0	0	1	2	31	0	0	146	0	8	0	11	0	0
104	193	471	tropical evergreen monsoon forest (E)	0	0	0	0	0	0	0	3	0	0	0	0	0	0	0	0	0
105	390	560	tropical evergreen monsoon forest (E)	0	0	0	0	0	0	0	0	0	0	0	0	0	0	1	0	0
106	390	655	tropical montane rainforest (M)	2	0	0	0	0	0	0	0	0	0	0	0	2	0	21	2	2
107	305	441	tropical evergreen monsoon forest (E)	0	0	0	0	0	0	0	7	0	2	12	0	0	0	0	0	0
108	390	753	tropical montane rainforest (M)	0	0	1	0	0	0	0	18	0	0	2	0	0	0	49	0	0
109	390	668	tropical montane rainforest (M)	0	0	0	0	0	0	0	0	0	0	0	0	0	0	1	0	0
110	311	564	tropical evergreen monsoon forest (E)	1	0	5	1	0	1	1	7	14	0	35	1	87	0	24	23	0
111	184	578	tropical evergreen monsoon forest (E)	0	0	1	0	0	0	0	12	0	0	0	0	3	0	4	0	0
112	387	504	tropical evergreen monsoon forest (E)	0	0	0	0	0	0	0	5	0	0	0	0	0	0	0	0	0
113	389	677	tropical evergreen monsoon forest (E)	0	0	0	0	0	0	4	5	1	0	0	0	7	0	1	0	0
114	389	616	tropical evergreen monsoon forest (E)	0	0	0	0	0	0	0	1	0	0	0	0	0	0	0	0	0
115	389	660	tropical montane rainforest (M)	0	0	0	0	0	0	0	1	0	0	0	0	0	0	0	0	0
116	389	575	tropical evergreen monsoon forest (E)	1	0	0	0	0	0	0	0	0	0	0	0	0	0	2	0	0
117	389	492	tropical evergreen monsoon forest (E)	0	0	0	0	0	0	0	0	0	0	0	0	0	0	0	0	0
118	389	457	tropical evergreen monsoon forest (E)	0	0	0	0	0	0	0	0	0	0	2	0	2	0	31	0	1
119	389	471	tropical evergreen monsoon forest (E)	0	0	0	0	0	0	0	1	2	0	0	0	1	14	4	0	0
120	389	380	tropical evergreen monsoon forest (E)	0	0	0	0	0	0	0	1	0	0	0	0	0	0	0	0	1
121	389	367	tropical evergreen monsoon forest (E)	0	0	0	0	0	0	0	1	0	0	0	0	12	0	3	2	1
122	391	762	tropical montane rainforest (M)	0	0	0	0	0	1	0	0	0	0	3	0	13	0	1	0	0
123	186	550	tropical evergreen monsoon forest (E)	0	0	0	2	0	4	0	4	0	0	0	0	1	0	1	0	0
